# Supplementary material for: Acute Effects of 160-Degree V-Shape Whole-Body Periodic Acceleration (WBPA) on Blood Pressure and Cardiovascular Hemodynamics
Source: MDPI journal article supplement (doi:10.3390/app12189116), 2022-09-11
Supplement: s1 [file s1]

Supplement 1: Sample size and power calculations.

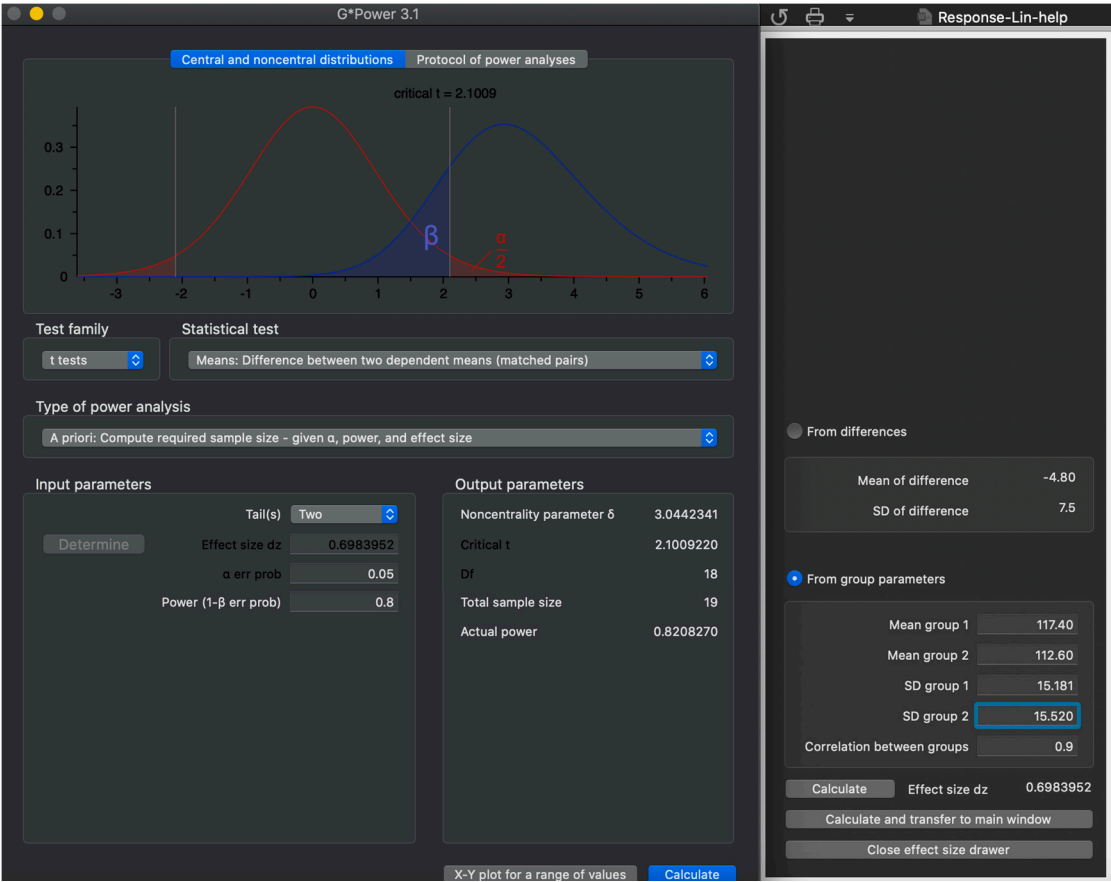

Supplement 2: The differences and effect size of pre-post parameters.

| Post/Pre           | Systolic BP | Diastolic BP | Heart Rate | End Sys | End Dia | M A P  | P P LV Esec Time | Cardiac Output | Stroke Vol | SV Compl | SV Resis | BA Compl | BA Disten | BA Resis |
|--------------------|-------------|--------------|------------|---------|---------|--------|------------------|----------------|------------|----------|----------|----------|-----------|----------|
|                    | -8.5        | -9.5         | -3.5       | -10     | -9.5    | -10    | -0.5             | 0.015          | 1.40       | 0.035    | -173.5   | -0.012   | -0.545    | 44       |
|                    | 3.5         | 3.5          | -4.5       | 8       | 3.5     | 3.5    | 4.5              | 0.008          | 0.25       | -0.05    | 264      | 0.0035   | 0.13      | 10.5     |
|                    | 5           | 0            | -8         | 0       | 0       | -1     | 0                | 0.013          | 0.90       | 0.01     | 172      | -0.003   | -0.14     | 13       |
|                    | -5          | 0            | -4.5       | 1       | 0       | 0      | 1                | -0.003         | 1.30       | 0        | 160.5    | 0        | -0.005    | 29       |
|                    | -10.5       | 0.5          | -7.5       | -18     | 0.5     | -4.5   | -18.5            | 0.070          | -3.50      | 0.325    | 256.5    | 0.0145   | 1.655     | -33.5    |
|                    | -6          | -5           | -5.5       | -6.5    | -5      | -6     | -1.5             | -0.005         | 0.05       | 0.025    | -46      | -0.002   | 0.13      | 19.5     |
|                    | -8          | -2           | -2         | -6      | -2      | -4     | -4               | 0.003          | -1.60      | 0.07     | -30      | -0.001   | 0.07      | 1        |
|                    | -3          | -7.5         | -9         | -1      | -7.5    | -5.5   | 6.5              | 0.029          | 1.55       | -0.04    | 17       | -0.004   | -0.205    | 45       |
|                    | 9           | 4.5          | 1.5        | 9       | 4.5     | 6      | 4.5              | 0.001          | -1.20      | -0.105   | 167.5    | -0.0015  | -0.45     | -13.5    |
|                    | -14         | -5           | -5         | -32     | -5      | -18    | -27              | 0.024          | -6.00      | 0.25     | -30      | 0.019    | 2.11      | -43      |
|                    | -1          | 1            | -2         | -1      | 1       | 3      | -2               | -0.090         | 3.40       | 0.15     | 68       | 0.023    | 2.11      | -14      |
|                    | -3          | -5.5         | -1         | -1      | -5.5    | -4.5   | 0                | -0.003         | -0.010     | -0.015   | 50       | 0.01     | 0.665     | -3.5     |
|                    | 6           | 2.5          | -5.5       | 3       | 2.5     | 5      | 0.5              | 0.022          | 1.75       | 0.03     | 140.5    | -0.0085  | -1.03     | 22.5     |
|                    | -10.5       | -2.5         | -1         | -12     | -2.5    | -7.5   | -9.5             | -0.004         | -1.80      | 0.09     | -87.5    | 0.0075   | 0.98      | -23      |
|                    | -16         | -11          | -7         | -18     | -11     | -15    | -7               | -0.017         | 2.50       | 0.11     | -275     | -0.001   | 0.29      | 37       |
|                    | 1.5         | 2.5          | -2         | 1       | 2.5     | 2.5    | -1.5             | 0.003          | -0.95      | 0.005    | 93.5     | 0.0065   | 0.52      | -12.5    |
|                    | -12         | -9           | -6         | -13     | -9      | -11    | -4               | 0.001          | 1.60       | 0.1      | -119     | -0.008   | -0.12     | 21       |
|                    | -7.5        | -3           | 5.5        | -13     | -3      | -1     | -10              | -0.004         | -2.40      | 0.14     | -83.5    | 0.0075   | 0.795     | -65.5    |
|                    | -17         | -6           | -1         | -17.5   | -6      | -10.5  | -11.5            | -0.009         | -3.00      | 0.27     | -111.5   | 0.015    | 2.255     | -15.5    |
|                    | 1           | 2            | 1.5        | 4       | 5.5     | 6      | -1.5             | -0.063         | -1.30      | 0        | 203.5    | 0.0085   | 0.435     | 1        |
| Mean of difference | -4.8        | -2.5         | -3.3       | -6.2    | -2.3    | -3.6   | -4.1             | 0.000          | -0.183     | 0.1      | 31.9     | 0.0      | 0.5       | 1.0      |
| SD of difference   | 7.5         | 4.7          | 3.7        | 10.4    | 4.9     | 7.0    | 8.1              | 0.032          | 2.30       | 0.1      | 149.9    | 0.0      | 0.9       | 29.3     |
| Effect Size        | -0.638      | -0.532       | -0.911     | -0.591  | -0.470  | -0.520 | -0.505           | -0.013         | -0.153     | 0.625    | 0.213    | 0.391    | 0.521     | 0.033    |
| p                  | 0.010       | 0.028        | 0.001      | 0.016   | 0.049   | 0.031  | 0.036            | 0.953          | 0.501      | 0.012    | 0.354    | 0.097    | 0.031     | 0.883    |
